# Supplementary material for: Na 6 MCl 8 rock-salt compounds with M = Mg, Ca, Ba, Zn, Sr as components for solid-state sodium ion batteries
Source: Royal Society of Chemistry journal article supplement (doi:10.1039/d4ra03533j), 2024-01-01
Supplement: d4ra03533j1.pdf [file d4ra03533j1.pdf]

## Supplementary Information

### **Na<sub>6</sub>MCl<sub>8</sub> Rock-Salt Compounds with M = Mg, Ca, Ba, Zn and Sr**

### **as Components for Sodium Ion Batteries**

**Yohandys A. Zulueta,<sup>a</sup> My Phuong Pham-Ho<sup>b,c</sup> and Minh Tho Nguyen<sup>d,e,\*</sup>**

<sup>a</sup> Departamento de Física, Facultad de Ciencias Naturales y Exactas, Universidad de Oriente, CP 90500, Santiago de Cuba, Cuba

<sup>b</sup> Faculty of Chemical Engineering, Ho Chi Minh City University of Technology (HCMUT), 268 Ly Thuong Kiet Street, District 10, Ho Chi Minh City, 70000 Vietnam

<sup>c</sup> Vietnam National University Ho Chi Minh City, Linh Trung, Thu Duc City, Ho Chi Minh City, 70000 Vietnam

<sup>d</sup> Laboratory for Chemical Computation and Modeling, Institute for Computational Science and Artificial Intelligence, Van Lang University, Ho Chi Minh City, 70000 Vietnam

<sup>e</sup> Faculty of Applied Technology, School of Technology, Van Lang University, Ho Chi Minh City, 70000 Vietnam.

\*Corresponding author; Email: [minhtho.nguyen@vlu.edu.vn](mailto:minhtho.nguyen@vlu.edu.vn)

Table S1. Elastic constants elements of  $\text{Na}_6\text{MCl}_8$  ( $\text{M}^{2+} = \text{Ca}, \text{Ba}, \text{Zn}$  and  $\text{Sr}$ ) structures

| <b><math>\text{Na}_6\text{ZnCl}_8</math></b> |        |        |        |        |        |        |
|----------------------------------------------|--------|--------|--------|--------|--------|--------|
| $C_{ij}$ Indices                             | 1      | 2      | 3      | 4      | 5      | 6      |
| 1                                            | 51.258 | 15.509 | 15.509 | 0      | 0      | 0      |
| 2                                            | 15.509 | 51.258 | 15.509 | 0      | 0      | 0      |
| 3                                            | 15.509 | 15.509 | 51.258 | 0      | 0      | 0      |
| 4                                            | 0      | 0      | 0      | 13.918 | 0      | 0      |
| 5                                            | 0      | 0      | 0      | 0      | 13.918 | 0      |
| 6                                            | 0      | 0      | 0      | 0      | 0      | 13.918 |
| <b><math>\text{Na}_6\text{CaCl}_8</math></b> |        |        |        |        |        |        |
| $C_{ij}$ Indices                             | 1      | 2      | 3      | 4      | 5      | 6      |
| 1                                            | 36.681 | 11.519 | 11.519 | 0      | 0      | 0      |
| 2                                            | 11.519 | 36.681 | 11.519 | 0      | 0      | 0      |
| 3                                            | 11.519 | 11.519 | 36.681 | 0      | 0      | 0      |
| 4                                            | 0      | 0      | 0      | 12.430 | 0.000  | 0.000  |
| 5                                            | 0      | 0      | 0      | 0      | 12.430 | 0.000  |
| 6                                            | 0      | 0      | 0      | 0      | 0.000  | 12.430 |
| <b><math>\text{Na}_6\text{SrCl}_8</math></b> |        |        |        |        |        |        |
| $C_{ij}$ Indices                             | 1      | 2      | 3      | 4      | 5      | 6      |
| 1                                            | 35.866 | 11.399 | 11.399 | 0      | 0      | 0      |
| 2                                            | 11.399 | 35.866 | 11.399 | 0      | 0      | 0      |
| 3                                            | 11.399 | 11.399 | 35.866 | 0      | 0      | 0      |
| 4                                            | 0      | 0      | 0      | 12.363 | 0      | 0      |
| 5                                            | 0      | 0      | 0      | 0      | 12.363 | 0      |
| 6                                            | 0      | 0      | 0      | 0      | 0      | 12.363 |
| <b><math>\text{Na}_6\text{BaCl}_8</math></b> |        |        |        |        |        |        |
| $C_{ij}$ Indices                             | 1      | 2      | 3      | 4      | 5      | 6      |
| 1                                            | 37.968 | 15.133 | 15.133 | 0      | 0      | 0      |
| 2                                            | 15.133 | 37.968 | 15.133 | 0      | 0      | 0      |
| 3                                            | 15.133 | 15.133 | 37.968 | 0      | 0      | 0      |
| 4                                            | 0      | 0      | 0      | 14.045 | 0      | 0      |
| 5                                            | 0      | 0      | 0      | 0      | 14.045 | 0      |
| 6                                            | 0      | 0      | 0      | 0      | 0      | 14.045 |
